# Supplementary material for: Estimation of isotope variation of N 2 O during denitrification by Pseudomonas aureofaciens and Pseudomonas chlororaphis : implications for N 2 O source apportionment
Source: Copernicus journal article supplement (doi:10.5194/bg-15-3873-2018), 2018-06-27
Supplement: Supplementary file 1 [file bg-15-3873-2018-supplement.pdf]

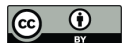

## *Supplement of*

# **Estimation of isotope variation of $\text{N}_2\text{O}$ during denitrification by *Pseudomonas aureofaciens* and *Pseudomonas chlororaphis*: implications for $\text{N}_2\text{O}$ source apportionment**

**Joshua A. Haslun et al.**

*Correspondence to:* Peggy H. Ostrom ([ostrom@msu.edu](mailto:ostrom@msu.edu))

The copyright of individual parts of the supplement might differ from the CC BY 4.0 License.

**Supplementary Table S1: Non-linear exponential models estimating the change in  $\delta^{15}\text{N}$  isotope values following reduction of  $\text{NO}_3^-$  to  $\text{N}_2\text{O}$  by two species of denitrifying bacteria across an extent of the reaction. The coefficients of each equation were determined from non-linear regression of  $\delta^{15}\text{N}\text{-N}_2\text{O}$  on  $[-\ln f/(1-f)]$ . The derivatives were used to determine  $\eta$  across the observed extent of the reaction.**

| Species                         | Carbon Source | Concentration | Non-Linear Model                                                             | Derivative of Non-Linear Model                             |
|---------------------------------|---------------|---------------|------------------------------------------------------------------------------|------------------------------------------------------------|
| <i>Pseudomonas aureofaciens</i> | Citrate       | 1             | $\delta^{15}\text{N} = 12.986 - e^{3.187\left[\frac{-f\ln f}{(1-f)}\right]}$ | $\eta = -3.187e^{3.187\left[\frac{-f\ln f}{(1-f)}\right]}$ |
|                                 |               | 10            | $\delta^{15}\text{N} = 14.821 - e^{3.455\left[\frac{-f\ln f}{(1-f)}\right]}$ | $\eta = -3.455e^{3.455\left[\frac{-f\ln f}{(1-f)}\right]}$ |
|                                 | Succinate     | 0.01          | $\delta^{15}\text{N} = 4.257 - e^{3.726\left[\frac{-f\ln f}{(1-f)}\right]}$  | $\eta = -3.726e^{3.726\left[\frac{-f\ln f}{(1-f)}\right]}$ |
|                                 |               | 1             | $\delta^{15}\text{N} = -0.097 - e^{3.524\left[\frac{-f\ln f}{(1-f)}\right]}$ | $\eta = -3.524e^{3.524\left[\frac{-f\ln f}{(1-f)}\right]}$ |
|                                 |               | 10            | $\delta^{15}\text{N} = 4.481 - e^{3.378\left[\frac{-f\ln f}{(1-f)}\right]}$  | $\eta = -3.378e^{3.378\left[\frac{-f\ln f}{(1-f)}\right]}$ |
| <i>Pseudomonas chlororaphis</i> | Citrate       | 0.1           | $\delta^{15}\text{N} = 4.997 - e^{3.356\left[\frac{-f\ln f}{(1-f)}\right]}$  | $\eta = -3.356e^{3.356\left[\frac{-f\ln f}{(1-f)}\right]}$ |
|                                 |               | 1             | $\delta^{15}\text{N} = 8.852 - e^{3.752\left[\frac{-f\ln f}{(1-f)}\right]}$  | $\eta = -3.752e^{3.752\left[\frac{-f\ln f}{(1-f)}\right]}$ |
|                                 |               | 10            | $\delta^{15}\text{N} = 7.188 - e^{3.664\left[\frac{-f\ln f}{(1-f)}\right]}$  | $\eta = -3.664e^{3.664\left[\frac{-f\ln f}{(1-f)}\right]}$ |
|                                 | Succinate     | 0.01          | $\delta^{15}\text{N} = 5.411 - e^{3.548\left[\frac{-f\ln f}{(1-f)}\right]}$  | $\eta = -3.548e^{3.548\left[\frac{-f\ln f}{(1-f)}\right]}$ |
|                                 |               | 0.1           | $\delta^{15}\text{N} = 5.516 - e^{3.370\left[\frac{-f\ln f}{(1-f)}\right]}$  | $\eta = -3.370e^{3.370\left[\frac{-f\ln f}{(1-f)}\right]}$ |
|                                 |               | 1             | $\delta^{15}\text{N} = 10.582 - e^{3.504\left[\frac{-f\ln f}{(1-f)}\right]}$ | $\eta = -3.504e^{3.504\left[\frac{-f\ln f}{(1-f)}\right]}$ |
|                                 |               | 10            | $\delta^{15}\text{N} = 8.746 - e^{3.356\left[\frac{-f\ln f}{(1-f)}\right]}$  | $\eta = -3.356e^{3.356\left[\frac{-f\ln f}{(1-f)}\right]}$ |

5

10

15

**Supplementary Table S2: Non-linear exponential models estimating the change in  $\delta^{18}\text{O}$  isotope values following reduction of  $\text{NO}_3^-$  to  $\text{N}_2\text{O}$  by two species of denitrifying bacteria across an extent of the reaction. The coefficients of each equation were determined from non-linear regression of  $\delta^{18}\text{O}$  on  $[-f \ln f / (1-f)]$ . The derivatives were used to determine  $\eta$  across the observed extent of the reaction.**

| Species                         | Carbon Source | Concentration | Non-Linear Model                                                                 | Derivative of Non-Linear Model                                  |
|---------------------------------|---------------|---------------|----------------------------------------------------------------------------------|-----------------------------------------------------------------|
| <i>Pseudomonas aureofaciens</i> | Citrate       | 1             | $\delta^{18}\text{O} = 15.593 - e^{2.549 \left[ \frac{-f \ln f}{(1-f)} \right]}$ | $\eta = -2.549 e^{2.549 \left[ \frac{-f \ln f}{(1-f)} \right]}$ |
|                                 |               | 10            | $\delta^{18}\text{O} = 13.606 - e^{2.260 \left[ \frac{-f \ln f}{(1-f)} \right]}$ | $\eta = -2.260 e^{2.260 \left[ \frac{-f \ln f}{(1-f)} \right]}$ |
|                                 | Succinate     | 0.01          | $\delta^{18}\text{O} = 11.737 - e^{1.813 \left[ \frac{-f \ln f}{(1-f)} \right]}$ | $\eta = -1.813 e^{1.813 \left[ \frac{-f \ln f}{(1-f)} \right]}$ |
|                                 |               | 1             | $\delta^{18}\text{O} = 52.359 - e^{3.312 \left[ \frac{-f \ln f}{(1-f)} \right]}$ | $\eta = -3.312 e^{3.312 \left[ \frac{-f \ln f}{(1-f)} \right]}$ |
|                                 |               | 10            | $\delta^{18}\text{O} = 50.978 - e^{3.079 \left[ \frac{-f \ln f}{(1-f)} \right]}$ | $\eta = -3.079 e^{3.079 \left[ \frac{-f \ln f}{(1-f)} \right]}$ |
| <i>Pseudomonas chlororaphis</i> | Citrate       | 0.1           | $\delta^{18}\text{O} = 70.519 - e^{2.675 \left[ \frac{-f \ln f}{(1-f)} \right]}$ | $\eta = -2.675 e^{2.675 \left[ \frac{-f \ln f}{(1-f)} \right]}$ |
|                                 |               | 1             | $\delta^{18}\text{O} = 75.956 - e^{3.433 \left[ \frac{-f \ln f}{(1-f)} \right]}$ | $\eta = -3.433 e^{3.433 \left[ \frac{-f \ln f}{(1-f)} \right]}$ |
|                                 |               | 10            | $\delta^{18}\text{O} = 73.385 - e^{3.289 \left[ \frac{-f \ln f}{(1-f)} \right]}$ | $\eta = -3.289 e^{3.289 \left[ \frac{-f \ln f}{(1-f)} \right]}$ |
|                                 | Succinate     | 0.01          | $\delta^{18}\text{O} = 66.495 - e^{3.014 \left[ \frac{-f \ln f}{(1-f)} \right]}$ | $\eta = -3.014 e^{3.014 \left[ \frac{-f \ln f}{(1-f)} \right]}$ |
|                                 |               | 0.1           | $\delta^{18}\text{O} = 69.863 - e^{2.974 \left[ \frac{-f \ln f}{(1-f)} \right]}$ | $\eta = -2.974 e^{2.974 \left[ \frac{-f \ln f}{(1-f)} \right]}$ |
|                                 |               | 1             | $\delta^{18}\text{O} = 78.748 - e^{3.343 \left[ \frac{-f \ln f}{(1-f)} \right]}$ | $\eta = -3.343 e^{3.343 \left[ \frac{-f \ln f}{(1-f)} \right]}$ |
|                                 |               | 10            | $\delta^{18}\text{O} = 76.600 - e^{3.127 \left[ \frac{-f \ln f}{(1-f)} \right]}$ | $\eta = -3.127 e^{3.127 \left[ \frac{-f \ln f}{(1-f)} \right]}$ |

# *Pseudomonas aureofaciens*

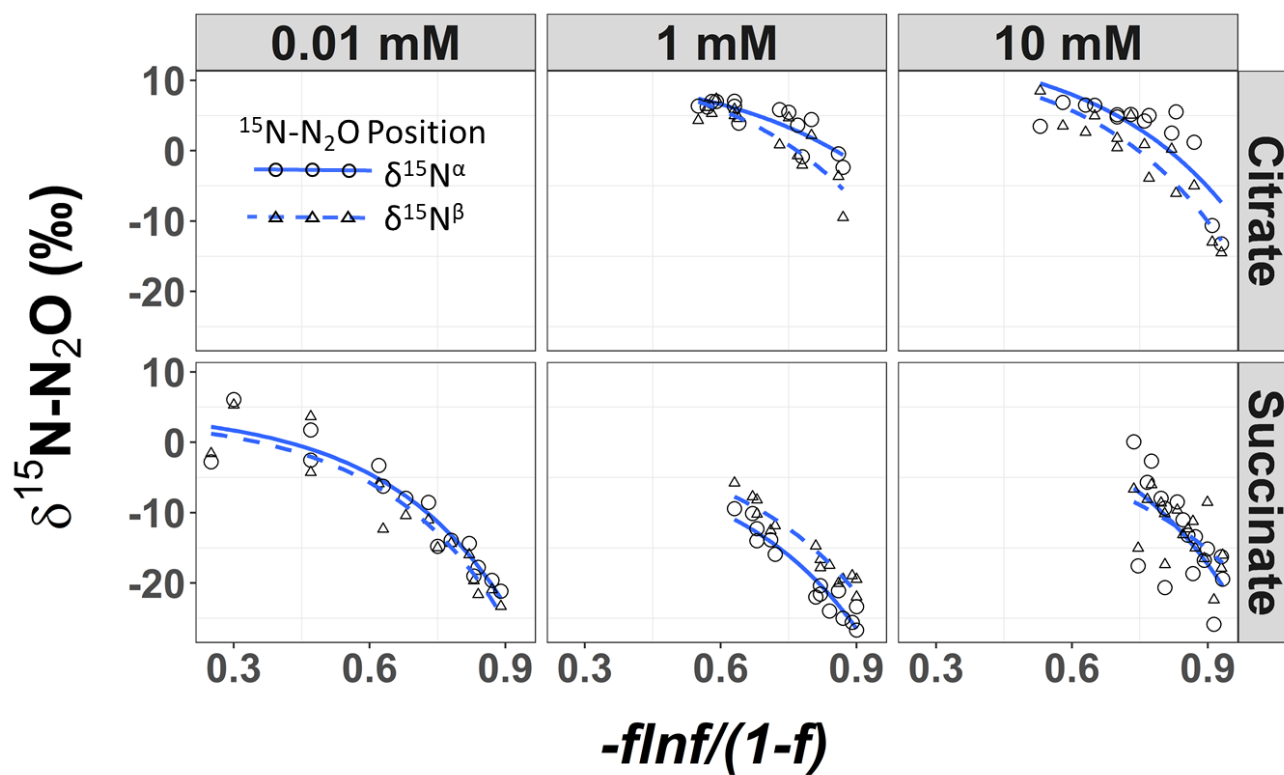

Supplementary Figure S1: The  $\delta^{15}\text{N}^{\alpha}$  (o) and  $\delta^{15}\text{N}^{\beta}$  (△) isotope values of  $\text{N}_2\text{O}$  produced during the anaerobic reduction of  $\text{NO}_3^-$  by *Pseudomonas aureofaciens*. Similar trends can be observed by non-linear models fit to  $\delta^{15}\text{N}^{\alpha}$  (solid line) and  $\delta^{15}\text{N}^{\beta}$  (dashed line).

5

10

15

## *Pseudomonas chlororaphis*

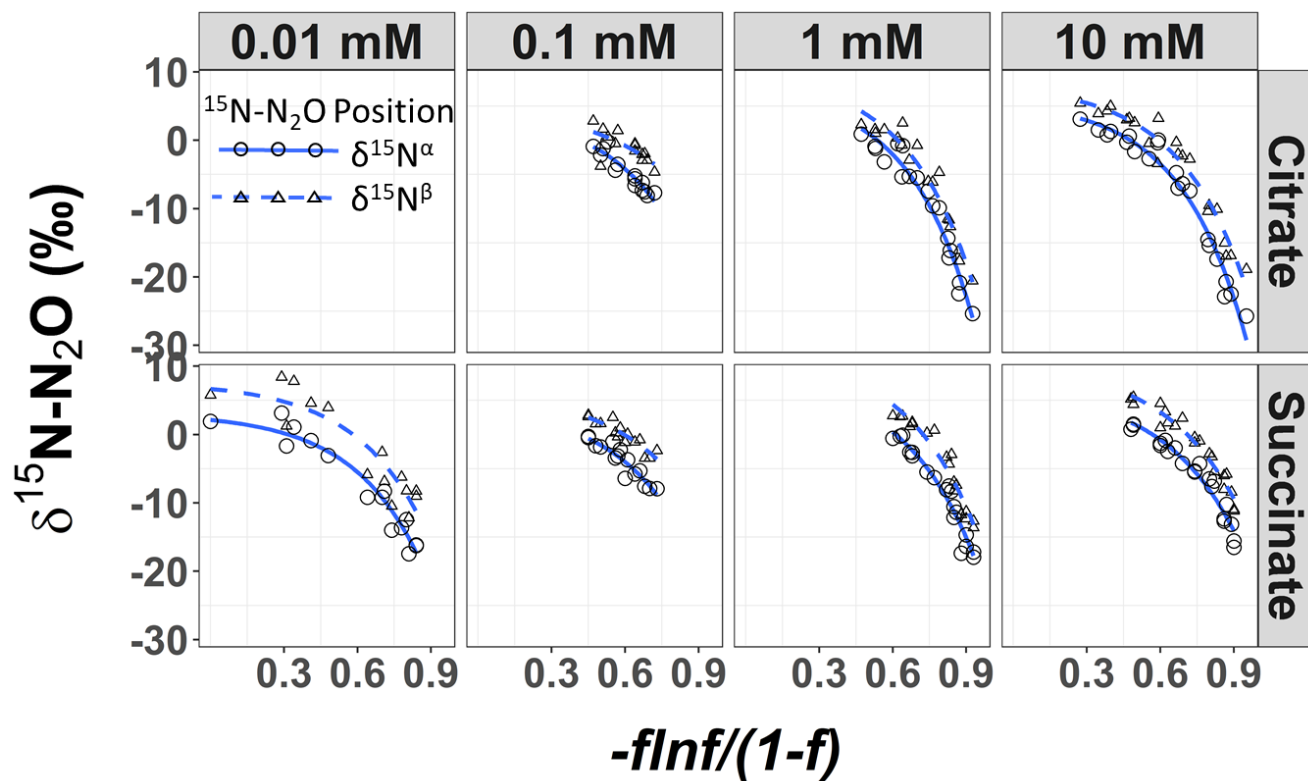

5 Supplementary Figure S2: The  $\delta^{15}\text{N}^{\alpha}$  (○) and  $\delta^{15}\text{N}^{\beta}$  (△) isotope values of  $\text{N}_2\text{O}$  produced during the anaerobic reduction of  $\text{NO}_3^-$  by *Pseudomonas chlororaphis*. Similar trends can be observed by non-linear models fit to  $\delta^{15}\text{N}^{\alpha}$  (solid line) and  $\delta^{15}\text{N}^{\beta}$  (dashed line).
